# Supplementary material for: Prevalence and spectrum of DNA mismatch repair gene variation in the general Chinese population
Source: HighWire-hosted journal article supplement (doi:10.1136/jmedgenet-2021-107886), 2021-06-25
Supplement: jmedgenet-2021-107886supp008_data_supplement.xlsx [file jmedgenet-2021-107886supp008_data_supplement.xlsx]

## Sheet: Sheet1
Table S7. Distribution of MMR coding variants in different types of cancer
Item	Genes (%)				Total (%)*
	MLH1	MSH2	MSH6	PMS2
Colon and rectal cancer	32 (14.2)	34 (15.1)	43 (19.1)	33 (14.7)	142 (63.1)
LS/HNPCC	29 (12.9)	32 (14.2)	26 (11.6)	13 (5.8)	100 (44.4)
Breast cancer	8 (3.6)	11 (4.9)	10 (4.4)	28 (12.4)	57 (25.3)
Ovarian cancer	9 (4.0)	4 (1.8)	13 (5.8)	8 (3.6)	34 (15.1)
Endometrial cancer	2 (0.9)	3 (1.3)	19 (8.4)	9 (4.0)	33 (14.7)
Suspected LS	1 (0.4)	7 (3.1)	2 (0.9)	7 (3.1)	17 (7.6)
Hepato-biliary and pancreatic cancer	3 (1.3)	2 (0.9)	4 (1.8)	1 (0.4)	10 (4.4)
Gastric cancer	0 (0.0)	3 (1.3)	4 (1.8)	0 (0.0)	7 (3.1)
Sebaceous gland cancer	0 (0.0)	0 (0.0)	1 (0.4)	5 (2.2)	6 (2.7)
Central nervous system cancer	0 (0.0)	1 (0.4)	1 (0.4)	2 (0.9)	4 (1.8)
Prostate cancer	1 (0.4)	1 (0.4)	2 (0.9)	0 (0.0)	4 (1.8)
HBOC	0 (0.0)	1 (0.4)	0 (0.0)	2 (0.9)	3 (1.3)
Non-medullary thyroid cancer	0 (0.0)	0 (0.0)	3 (1.3)	0 (0.0)	3 (1.3)
Bladder cancer	1 (0.4)	0 (0.0)	1 (0.4)	0 (0.0)	2 (0.9)
HCPS	0 (0.0)	1 (0.4)	0 (0.0)	1 (0.4)	2 (0.9)
Lung cancer	1 (0.4)	0 (0.0)	0 (0.0)	1 (0.4)	2 (0.9)
Renal pelvis and ureter cancer	1 (0.4)	1 (0.4)	0 (0.0)	0 (0.0)	2 (0.9)
Acute lymphocytic leukemia	0 (0.0)	1 (0.4)	0 (0.0)	0 (0.0)	1 (0.4)
Acute myeloid leukemia	0 (0.0)	0 (0.0)	1 (0.4)	0 (0.0)	1 (0.4)
Familial non-medullary thyroid cancer	0 (0.0)	1 (0.4)	0 (0.0)	0 (0.0)	1 (0.4)
Hepatic cancer	0 (0.0)	0 (0.0)	1 (0.4)	0 (0.0)	1 (0.4)
Small intestine cancer/Duodenal cancer	0 (0.0)	0 (0.0)	0 (0.0)	1 (0.4)	1 (0.4)
Total	53 (23.6)	53 (23.6)	64 (28.4)	55 (24.4)	225 (100.0)
* the combined numbers may be > 100% due to the overlapped cancer types in different items
