# Supplementary material for: Prevalence and spectrum of DNA mismatch repair gene variation in the general Chinese population
Source: HighWire-hosted journal article supplement (doi:10.1136/jmedgenet-2021-107886), 2021-06-25
Supplement: jmedgenet-2021-107886supp009_data_supplement.xlsx [file jmedgenet-2021-107886supp009_data_supplement.xlsx]

## Sheet: Sheet1
Table S8. MLH1 pathogenic and benign variants used in structural study
Genome position	Base change	Amino acid change
Pathogenic
chr3:37061902	c.986A>C	H329P
chr3:37059089	c.883A>G	S295G
chr3:37059089	c.883A>C	S295R
chr3:37059090	c.884G>A	S295N
chr3:37059048	c.842C>T	A281V
chr3:37058999	c.793C>A	R265S
chr3:37058999	c.793C>T	R265C
chr3:37055984	c.739T>C	S247P
chr3:37055976	c.731G>A	G244D
chr3:37053590	c.677G>A	R226Q
chr3:37050396	c.545G>A	R182K
chr3:37048483	c.382G>C	A128P
chr3:37042544	c.306G>C	E102D
chr3:37042483	c.245C>T	T82I
chr3:37042467	c.229T>C	C77R
chr3:37042468	c.230G>A	C77Y
chr3:37038192	c.199G>A	G67R
chr3:37038192	c.199G>T	G67W
chr3:37038193	c.200G>A	G67E
chr3:37038180	c.187G>A	D63N
chr3:37038182	c.189C>A	D63E
chr3:37038124	c.131C>T	S44F
chr3:37038114	c.121G>C	D41H
chr3:37038115	c.122A>G	D41G
chr3:37035124	c.86C>G	A29G
chr3:37035100	c.62C>T	A21V
chr3:37035100	c.62C>A	A21E
chr3:37035093	c.55A>T	I19F
Benign
chr3:37067129	c.1040C>A	T347N
chr3:37061893	c.977T>C	V326A
chr3:37059009	c.803A>G	E268G
chr3:37053568	c.655A>C	I219L
chr3:37053568	c.655A>G	I219V
chr3:37053550	c.637G>A	V213M
chr3:37048495	c.394G>C	D132H
chr3:37035103	c.65G>C	G22A
